# Supplementary material for: Multi-biomarker is an early-stage predictor for progression of Coronavirus disease 2019 (COVID-19) infection
Source: PubMed Central journal article supplement (PMC8241766; doi:10.7150/ijms.58742), 2021-05-27

**Supplementary Figure 1: Meta-analysis of the risk factors between mild patients and severe patients.**

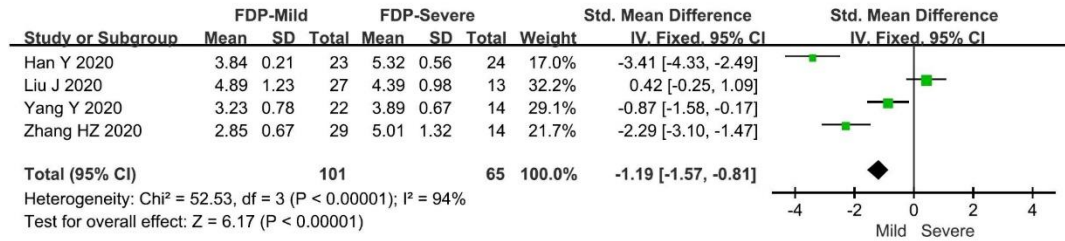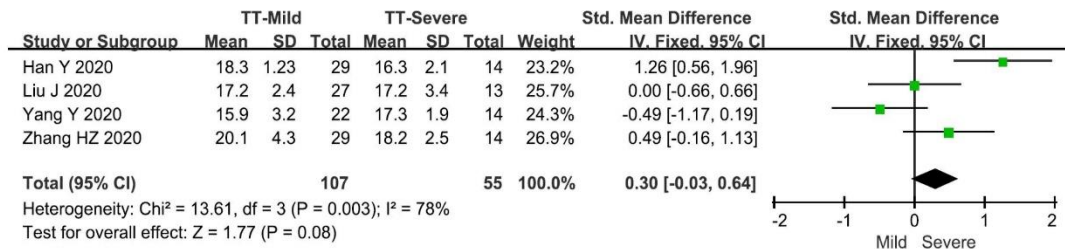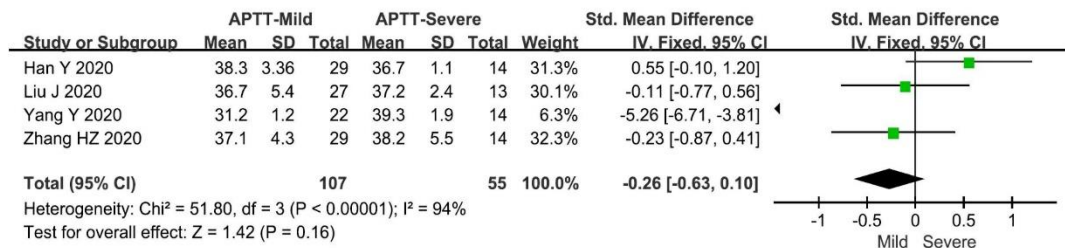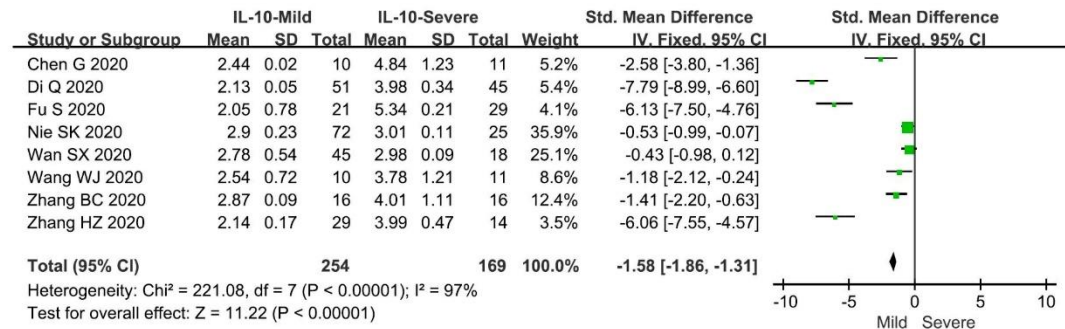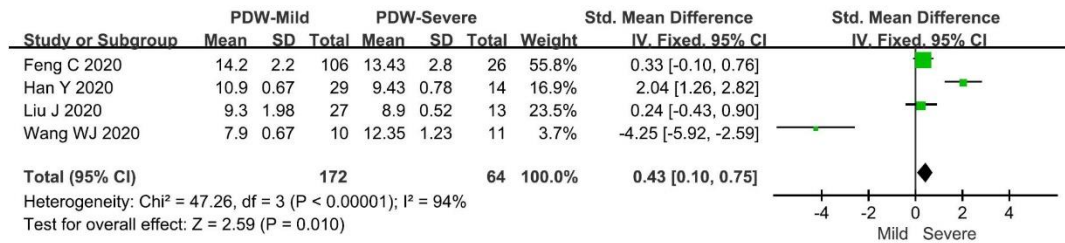

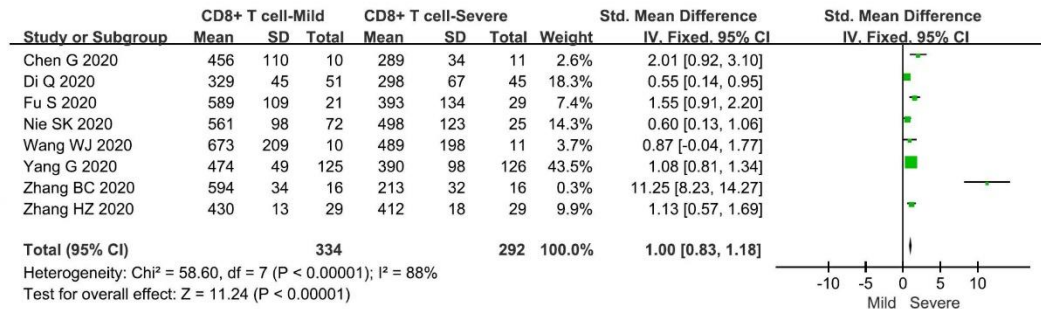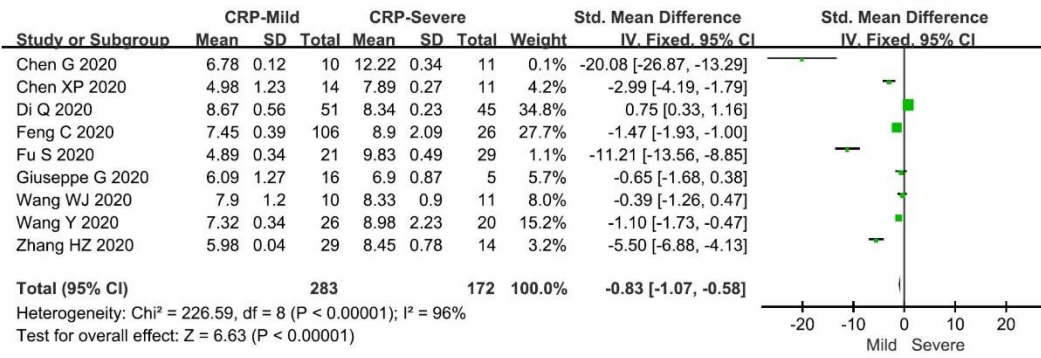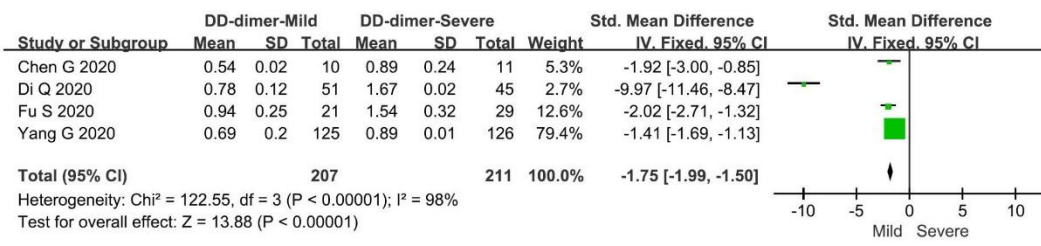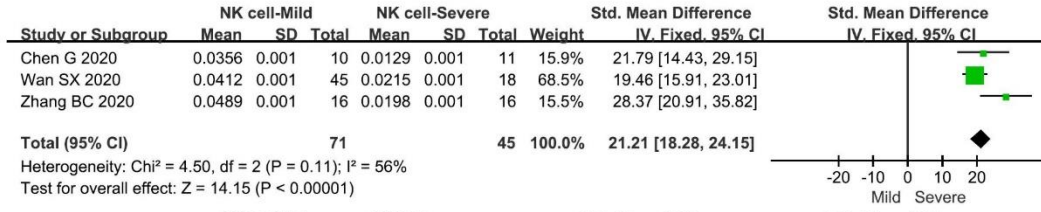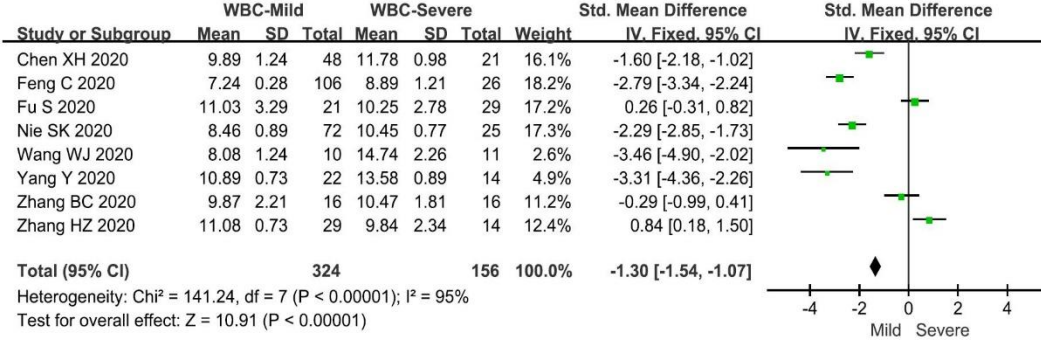

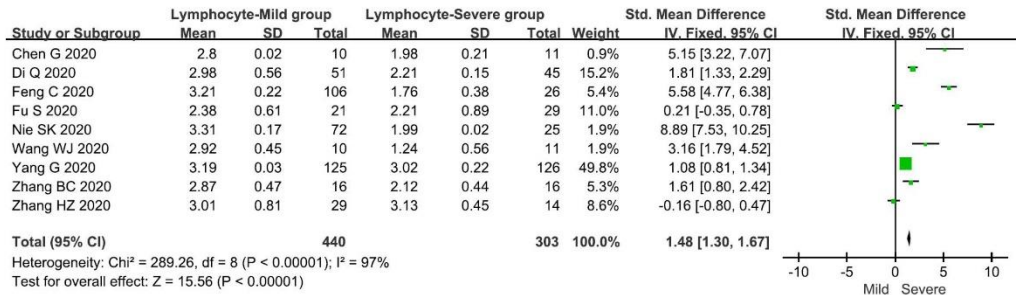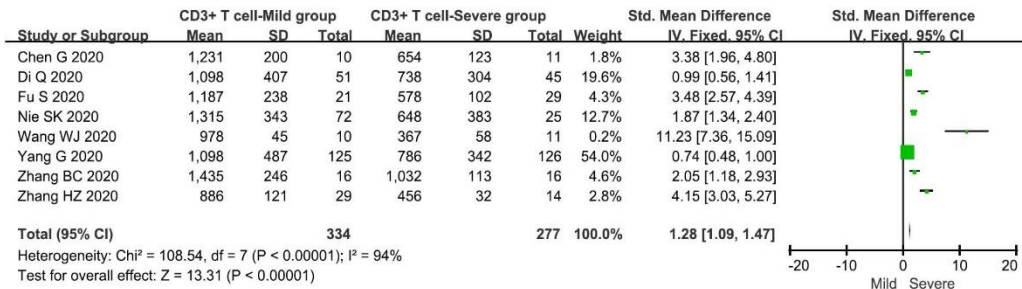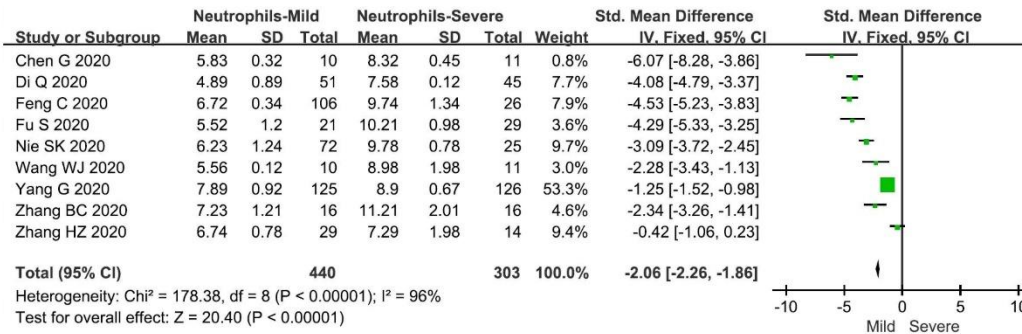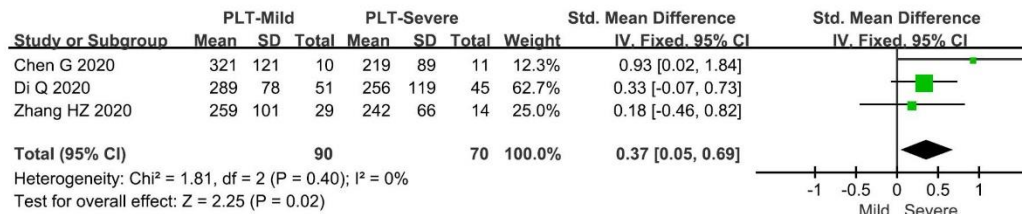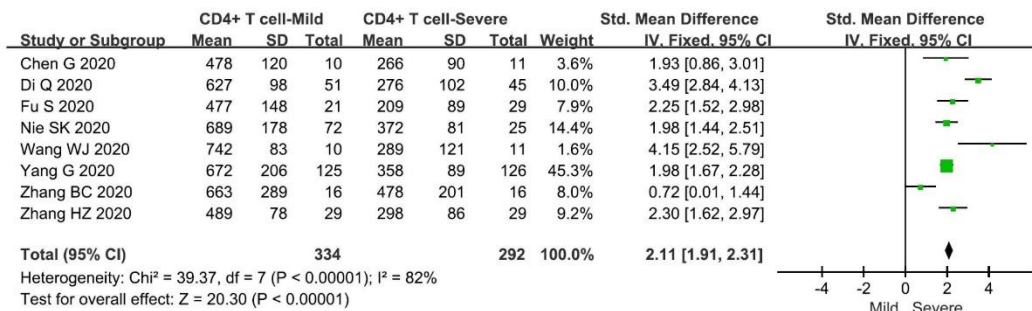

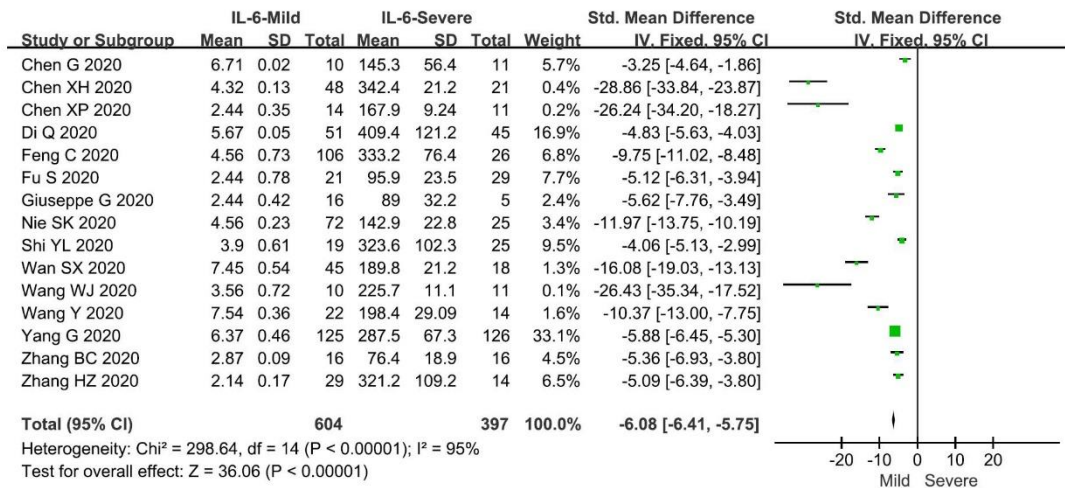

Supplement: ijmsv18p2789s1.pdf [file ijmsv18p2789s1.pdf]
